# Supplementary material
Source: MDPI journal article supplement (https://www.mdpi.com/1660-4601/12/4/3600)
Supplement: s1 [file s1]

# Integrating Environmental and Human Health Databases in the Great Lakes Basin: Themes, Challenges and Future Directions

## Table of Contents:

**Table S1.** Search Terms Used in Article Database Searches.

---

Great Lakes AND (health OR health outcomes) AND (environmental stressors OR environmental hazards OR environment OR datasets OR water quality OR air pollution OR air quality OR monitoring OR surveillance OR environmental tracking OR environmental health indicators OR area of concern OR public health tracking OR survey OR toxic OR toxins OR harmful algal blooms OR run-offs OR farm management OR hazardous waste OR contamination OR biomonitoring OR vulnerable populations OR Aboriginal OR Tribal OR children OR pregnant women OR fetus OR diet OR fish consumption OR surface water OR ground water OR stream OR river OR wetlands OR drinking water OR well OR sport fish OR discharge)

---

Lake Ontario AND (health OR health outcomes) AND (environmental stressors OR environmental hazards OR environment OR datasets OR water quality OR air pollution OR air quality OR monitoring OR surveillance OR environmental tracking OR environmental health indicators OR area of concern OR public health tracking OR survey OR toxic OR toxins OR harmful algal blooms OR run-offs OR farm management OR hazardous waste OR contamination OR biomonitoring OR vulnerable populations OR Aboriginal OR Tribal OR children OR pregnant women OR fetus OR diet OR fish consumption OR surface water OR ground water OR stream OR river OR wetlands OR drinking water OR well OR sport fish OR discharge)

---

Lake Superior AND (health OR health outcomes) AND (environmental stressors OR environmental hazards OR environment OR datasets OR water quality OR air pollution OR air quality OR monitoring OR surveillance OR environmental tracking OR environmental health indicators OR area of concern OR public health tracking OR survey OR toxic OR toxins OR harmful algal blooms OR run-offs OR farm management OR hazardous waste OR contamination OR biomonitoring OR vulnerable populations OR Aboriginal OR Tribal OR children OR pregnant women OR fetus OR diet OR fish consumption OR surface water OR ground water OR stream OR river OR wetlands OR drinking water OR well OR sport fish OR discharge)

---

Lake Michigan AND (health OR health outcomes) AND (environmental stressors OR environmental hazards OR environment OR datasets OR water quality OR air pollution OR air quality OR monitoring OR surveillance OR environmental tracking OR environmental health indicators OR area of concern OR public health tracking OR survey OR toxic OR toxins OR harmful algal blooms OR run-offs OR farm management OR hazardous waste OR contamination OR biomonitoring OR vulnerable populations OR Aboriginal OR Tribal OR children OR pregnant women OR fetus OR diet OR fish consumption OR surface water OR ground water OR stream OR river OR wetlands OR drinking water OR well OR sport fish OR discharge)

---

**Table S1. Cont.**

|                                                                                                                                                                                                                                                                                                                                                                                                                                                                                                                                                                                                                                                                                                          |
|----------------------------------------------------------------------------------------------------------------------------------------------------------------------------------------------------------------------------------------------------------------------------------------------------------------------------------------------------------------------------------------------------------------------------------------------------------------------------------------------------------------------------------------------------------------------------------------------------------------------------------------------------------------------------------------------------------|
| Lake Huron AND (health OR health outcomes) AND (environmental stressors OR environmental hazards OR environment OR datasets OR water quality OR air pollution OR air quality OR monitoring OR surveillance OR environmental tracking OR environmental health indicators OR area of concern OR public health tracking OR survey OR toxic OR toxins OR harmful algal blooms OR run-offs OR farm management OR hazardous waste OR contamination OR biomonitoring OR vulnerable populations OR Aboriginal OR Tribal OR children OR pregnant women OR fetus OR diet OR fish consumption OR surface water OR ground water OR stream OR river OR wetlands OR drinking water OR well OR sport fish OR discharge) |
| Lake Erie AND (health OR health outcomes) AND (environmental stressors OR environmental hazards OR environment OR datasets OR water quality OR air pollution OR air quality OR monitoring OR surveillance OR environmental tracking OR environmental health indicators OR area of concern OR public health tracking OR survey OR toxic OR toxins OR harmful algal blooms OR run-offs OR farm management OR hazardous waste OR contamination OR biomonitoring OR vulnerable populations OR Aboriginal OR Tribal OR children OR pregnant women OR fetus OR diet OR fish consumption OR surface water OR ground water OR stream OR river OR wetlands OR drinking water OR well OR sport fish OR discharge)  |

**Table S2. Government and Environmental/Health Organization Websites searched.**

| Canada                                                  | United States                                                       |
|---------------------------------------------------------|---------------------------------------------------------------------|
| Statistics Canada                                       | Centers for Disease Control and Prevention                          |
| Canadian Institutes of Health Information               | United States Environmental Protection Agency                       |
| Canadian Institutes of Health Research                  | United States Census Bureau                                         |
| Institute for Clinical Evaluation Sciences              | United States Geological Survey                                     |
| Environment Canada                                      | United States Food and Drug Administration                          |
| Health Canada                                           | United States Department of Agriculture                             |
| Public Health Agency of Canada                          | United States Government                                            |
| Natural Resources Canada                                | Agency for Toxic Substances and Disease Registry                    |
| Ontario Ministry of Agriculture, Food and Rural Affairs | Michigan Department of Environmental Quality                        |
| Ontario Ministry of Health and Long-Term Care           | Michigan Department of Community Health                             |
| Ontario Ministry of the Environment and Climate Change  | Pennsylvania Department of Environmental Protection                 |
| Ontario Ministry of Natural Resources                   | Pennsylvania Department of Conservation and Natural Resources       |
| Ontario Ministry of Northern Development and Mines      | Pennsylvania Department of Health                                   |
| Ontario Ministry of Transportation                      | Wisconsin Department of Agriculture, Trader and Consumer Protection |
| Public Health Ontario                                   | Wisconsin Department of Natural Resources                           |
| Fisheries and Oceans Canada                             | Wisconsin Department of Health Services                             |
|                                                         | Ohio Lake Management Society                                        |
|                                                         | Ohio Department of Health                                           |
|                                                         | Ohio Environmental Protection Agency                                |

**Table S2.** *Cont.*

| Canada | United States                                              |
|--------|------------------------------------------------------------|
|        | Ohio Department of Natural Resources                       |
|        | New York State Department of<br>Environmental Conservation |
|        | New York State Department of Health                        |
|        | Indiana Department of<br>Environmental Management          |
|        | Indiana State Department of Health                         |
|        | Indiana Geological Survey                                  |
|        | Illinois State Water Survey                                |
|        | Illinois Environmental Protection Agency                   |
|        | Illinois Department of Public Health                       |
|        | Minnesota Pollution Control Agency                         |
|        | Minnesota Department of Health                             |
|        | Minnesota Department of Natural Resources                  |
|        | Minnesota Geological Survey                                |
|        | California Department of Health Services                   |
|        | California Environmental Protection Agency                 |

© 2015 by the authors; licensee MDPI, Basel, Switzerland. This article is an open access article distributed under the terms and conditions of the Creative Commons Attribution license (<http://creativecommons.org/licenses/by/4.0/>).
